# Supplementary material
Source: PubMed Central journal article supplement (PMC4393013)
Supplement: NIHMS673912-supplement-1.pdf [file NIHMS673912-supplement-1.pdf]

# Figure S1

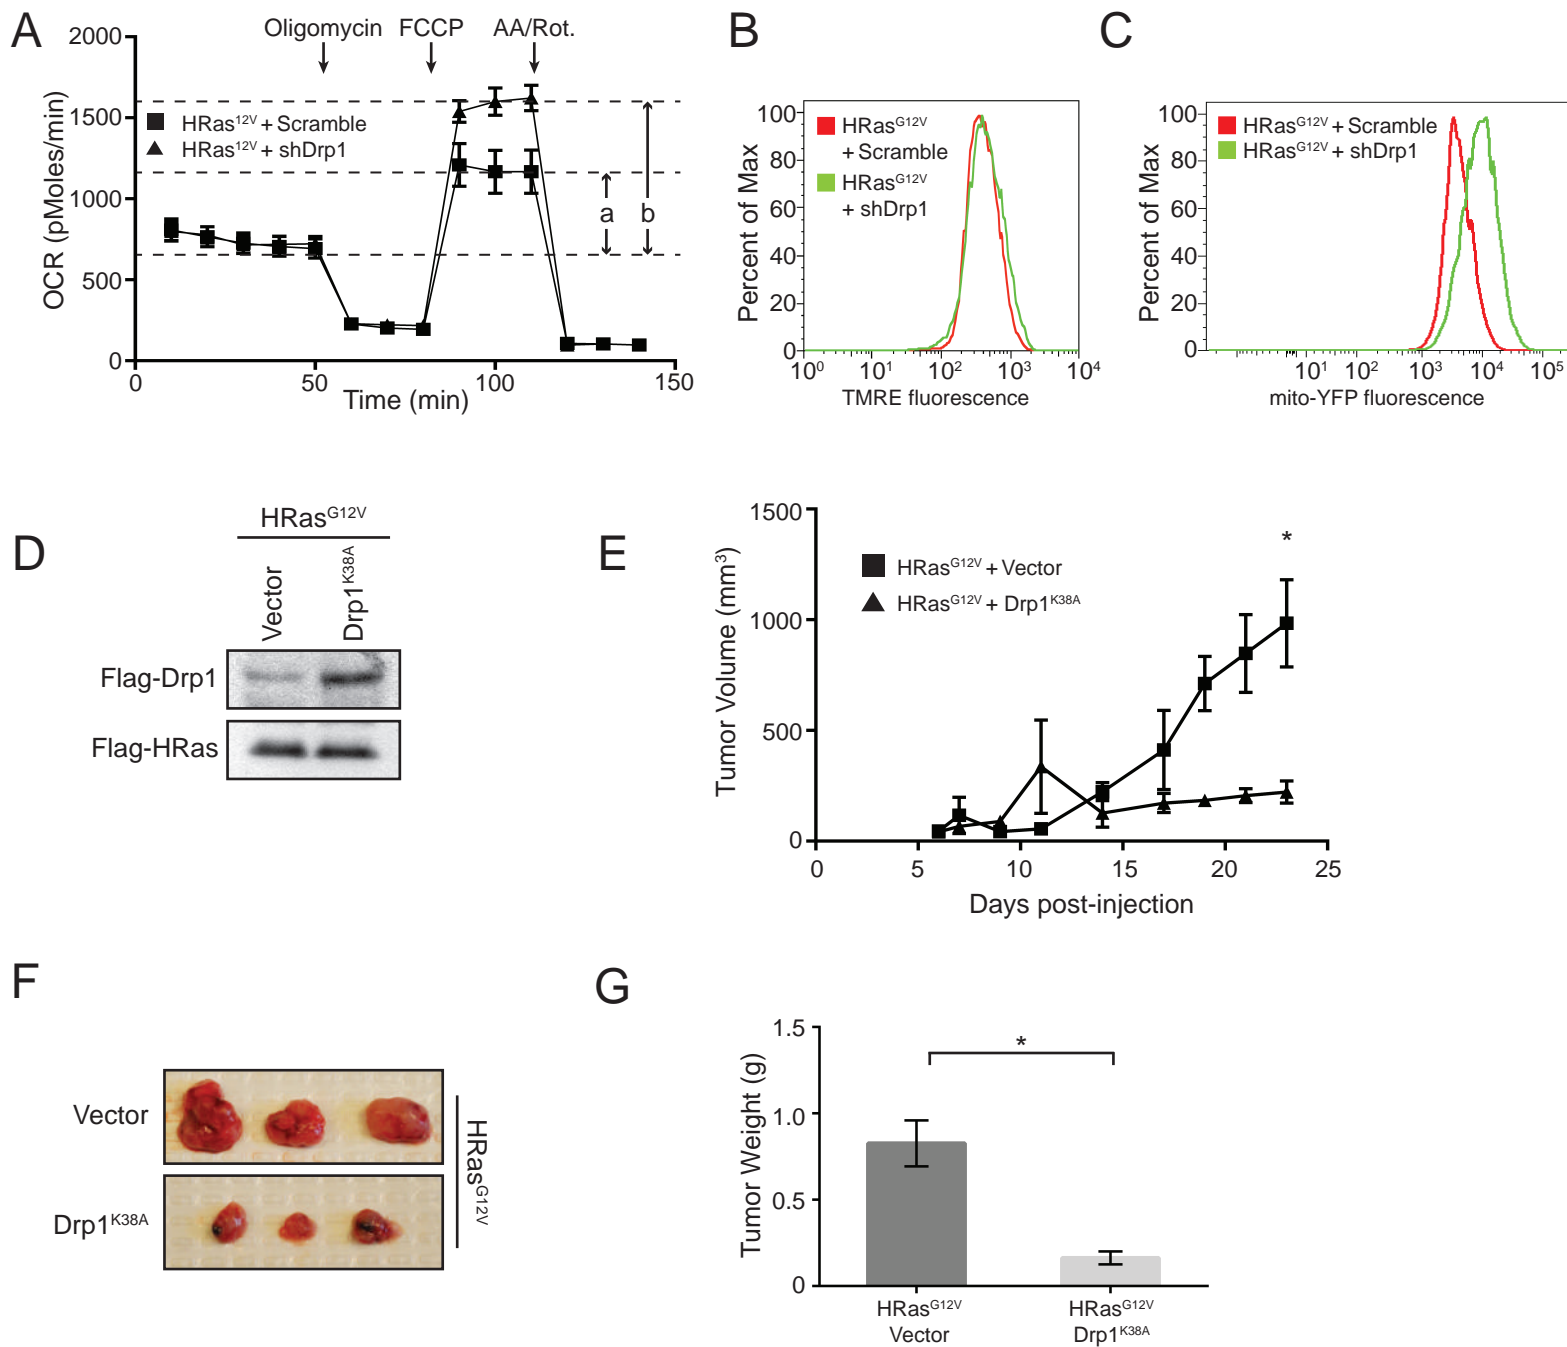

**Figure S1. Inhibition of Drp1 in Ras-expressing HEK-TtH Cells.** (Related to Figure 1) **A.** Oxygen consumption rate was measured using an XF24 extracellular flux analyzer in HEK-TtH cell expressing HRas<sup>G12V</sup> and an shRNA targeting either scramble control or Drp1. Oligomycin, FCCP, Rotenone and Antimycin A were added at the indicated time-points (arrows). Spare respiratory capacity is measured as the difference between basal oxygen consumption rate and the FCCP uncoupled oxygen consumption rate (a,b). **B.** TMRE was added to HEK-TtH cell expressing HRas<sup>G12V</sup> and an shRNA targeting either scramble control or Drp1 and fluorescence was measured by flow cytometry. **C.** The levels of fluorescence in HEK-TtH cells expressing mito-YFP, HRas<sup>G12V</sup>, and an shRNA targeting either scramble control or Drp1 were analyzed by flow cytometry. **D.** HEK-TtH cells stably expressing HRas<sup>G12V</sup> and either empty vector or Drp1<sup>K38A</sup> were analyzed by immunoblot for expression of Flag-Drp1 and Flag-HRas. **E.** The cells were injected into SCID/Beige mice and tumor volume was measured over time. **F-G.** Tumors were removed at day 24 to be photographed and weighed. n=3 tumors per cell line; error bars: S.E.M. of mean tumor volume (E) or tumor weight (G). \* Two-tailed t-test, p=0.0352 (E) or p=0.0280 (G).

# Figure S2

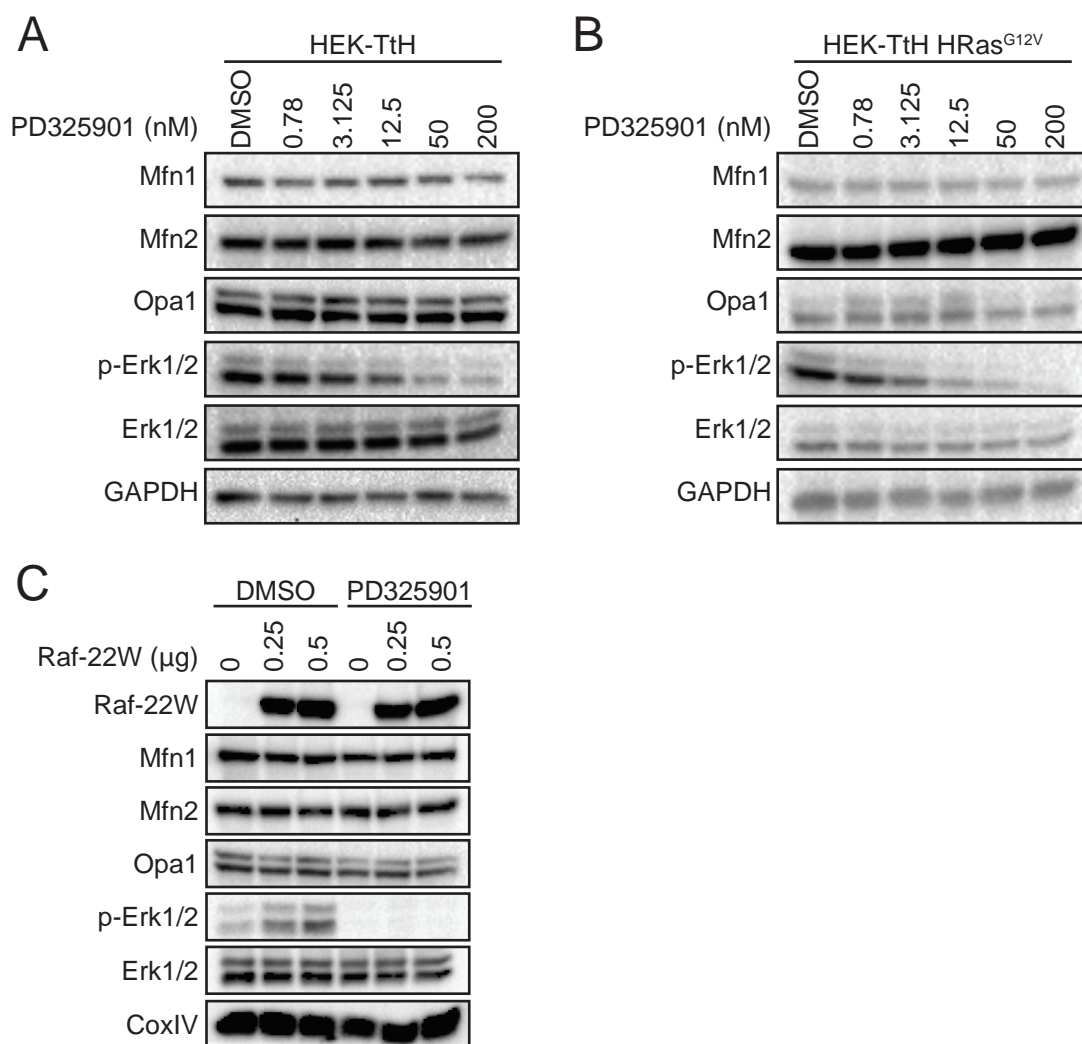

**Figure S2. Inhibition of Mek/Erk signaling does not affect levels of fusion proteins.** (Related to Figure 2) **A.** HEK-TtH cells, supplemented with 10% FBS, were treated with 0.78-200nM of the MEK inhibitor PD325901 and the levels of Mfn1 and Mfn2, the processing of Opa1 and the phosphorylation of Erk1/2 (Y202/T204) were analyzed by immunoblot. GAPDH: Loading Control. **B.** HEK-TtH cells stably expressing HRas<sup>G12V</sup> were treated with 0.78-200nM of the MEK inhibitor PD325901 and the levels of Mfn1 and Mfn2, the processing of Opa1 and the phosphorylation of Erk1/2 (Y202/T204) were analyzed by immunoblot. GAPDH: Loading Control. **C.** HeLa cells were transfected with increasing amounts of active Raf-22W in the presence of DMSO or MEK inhibitor PD325901 and the levels of Mfn1 and Mfn2, the processing of Opa1 and the phosphorylation of Erk1/2 (Y202/T204) were analyzed by immunoblot. GAPDH: Loading Control.

# Figure S3

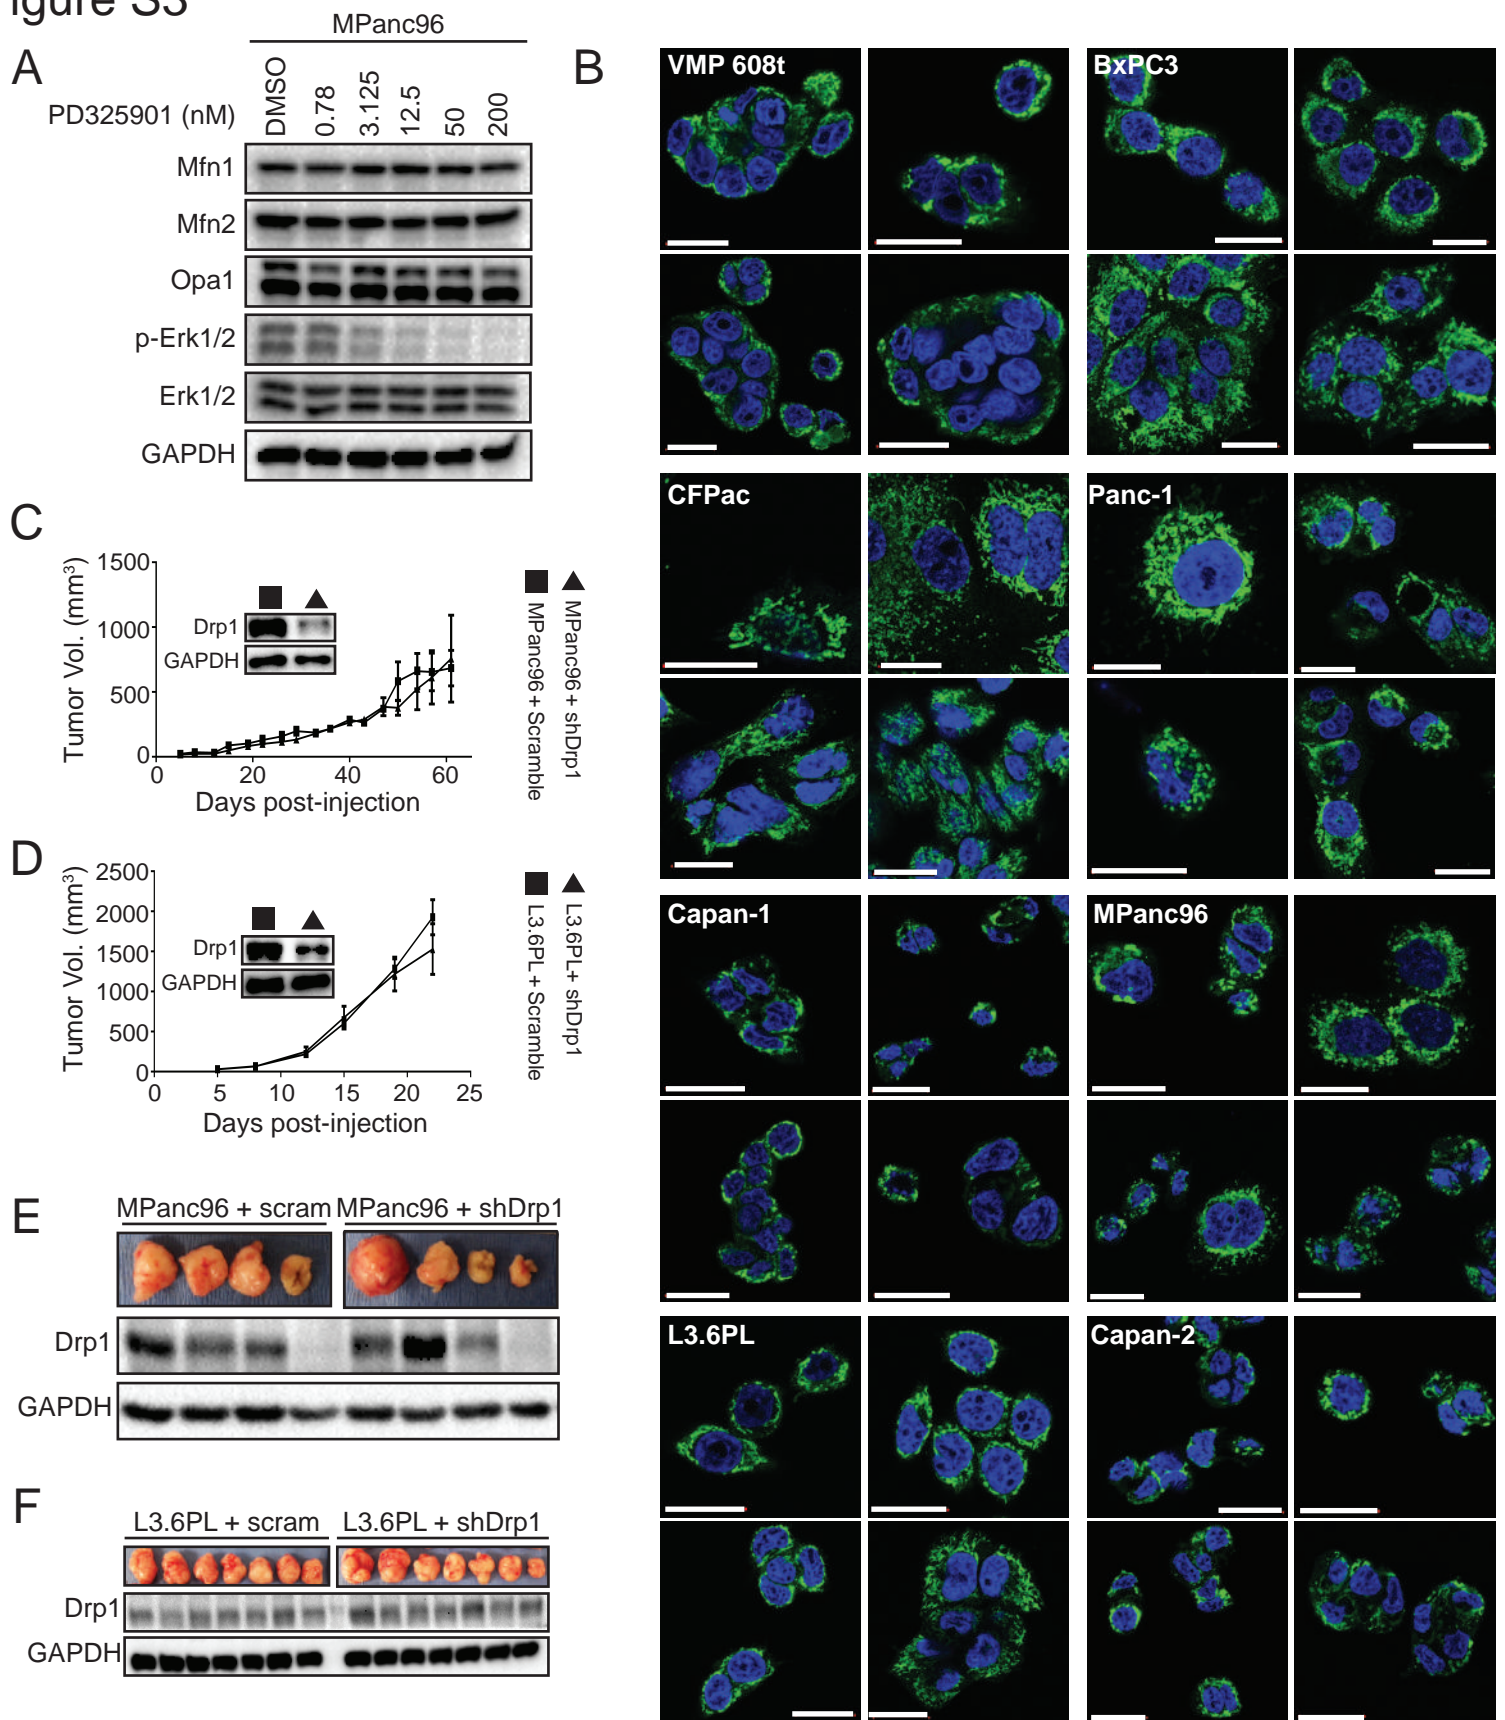

**Figure S3. Analysis of Pancreatic Cancer Cell lines.** (Related to Figure 4) A. MPanc96 cells were treated with 0.78-200nM PD325901 for 8 hours and the levels of the indicated proteins were analyzed by immunoblot. GAPDH: Loading Control. B. Confocal microscopy of the mitochondrial morphology of 8 patient-derived pancreatic cancer cell lines. Green: anti-Tom20; Blue: DAPI. 4 representative images of each cell line are shown. Scale Bar = 20 $\mu$ m. C-F. Xenograft growth of pancreatic cancer cell lines. MPanc96 (C & E) and L3.6PL (D & F) cells expressing an shRNA targeting either scramble control or Drp1 were analyzed by immunoblot then injected into Nude mice and tumor volume was measured over time. GAPDH: Loading controls. Error bars: S.E.M. of mean tumor volume.

## Figure S4

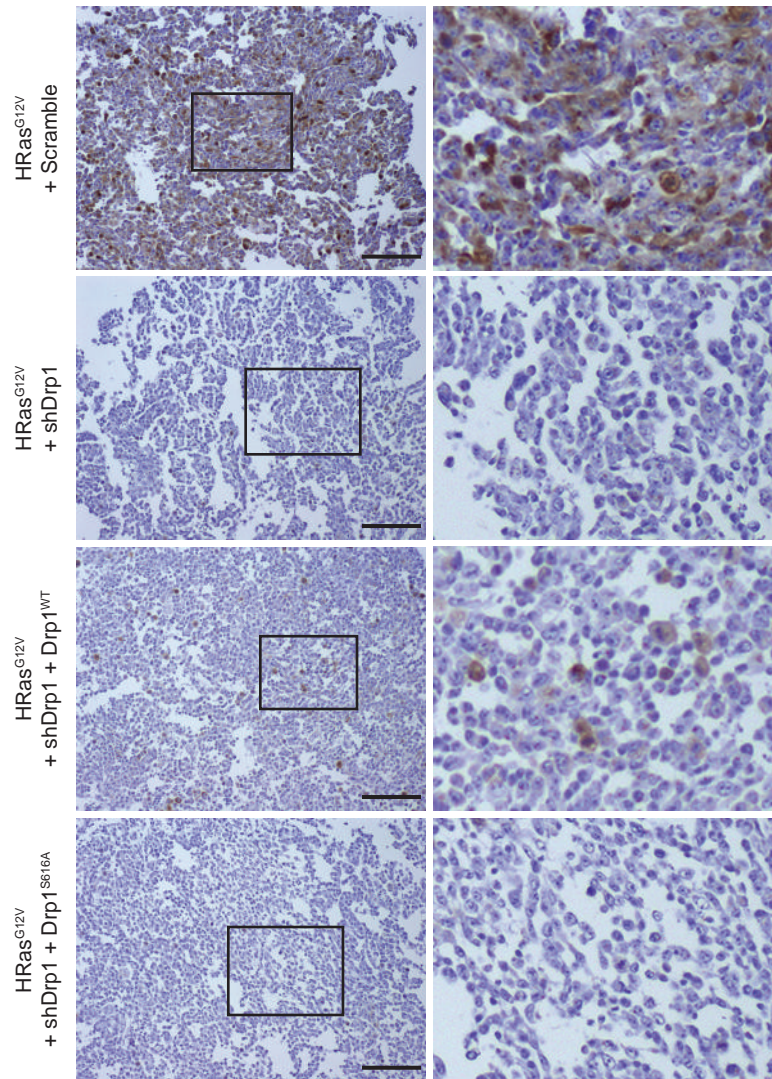

Figure S4. **Validation of the use of a phospho-specific S616 Drp1 antibody for immunohistochemistry.** (Related to Figure 5). HEK-TtH cells were engineered to express Flag-HRas<sup>G12V</sup> plus an shRNA targeting either scramble control or Drp1 and then rescued with either vector, Flag-Drp1<sup>WT</sup> or Flag-Drp1<sup>S616A</sup>. Cell pellets were fixed in formalin, embedded in paraffin and sections were cut and stained using an antibody specific for p-Drp1 (S616). Left image: Scale bar = 100 $\mu$ m; Right image: enlargement of boxed area.

# Figure S5

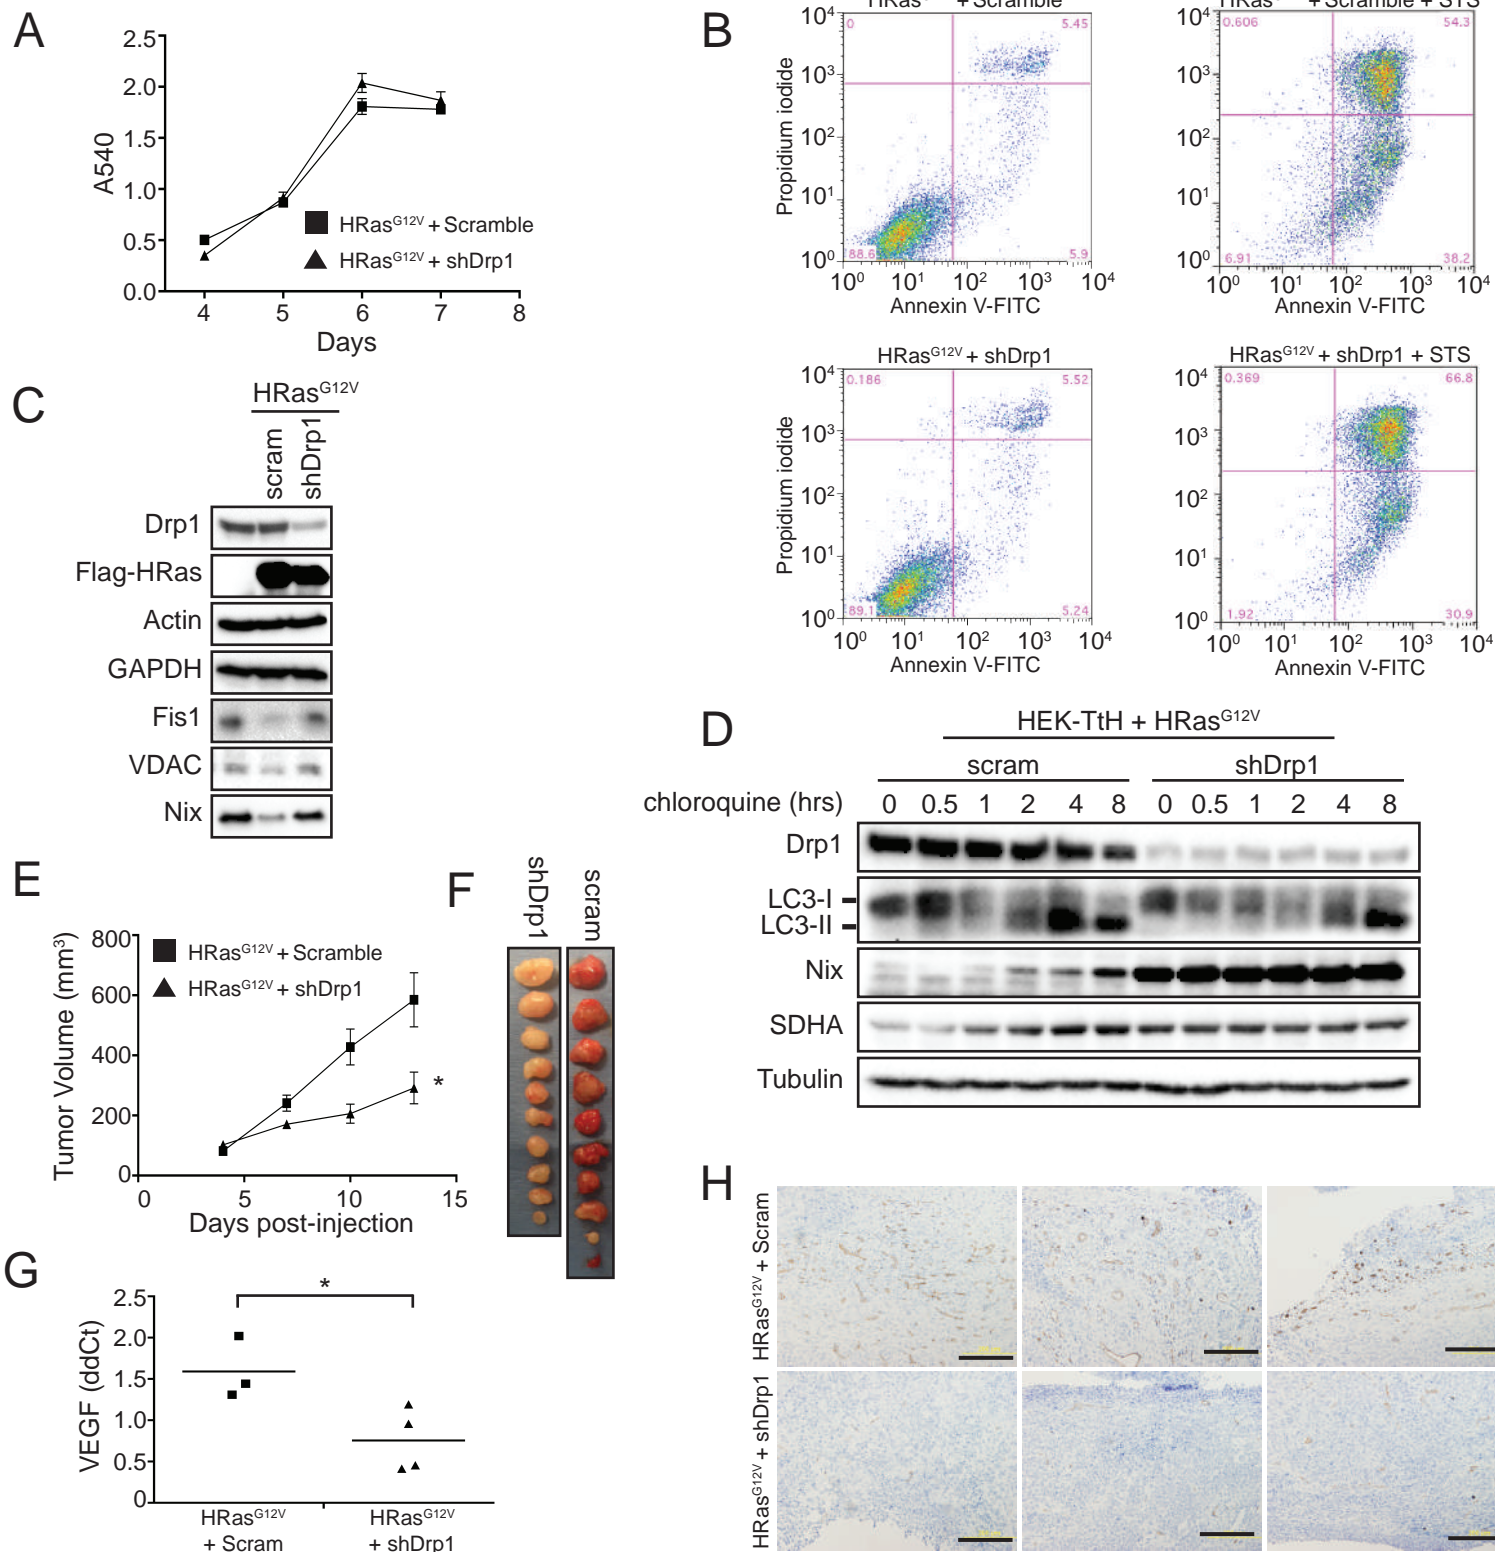

**Figure S5. Drp1 knockdown has no effect on proliferation or apoptosis, but decreases angiogenesis.** (Related to Figure 6) A. MTT assays were performed 4, 5, 6 and 7 days after seeding HEK-TtH cells expressing Flag-HRas<sup>G12V</sup> plus an shRNA targeting either scramble control or Drp1. B. The same cell lines were left untreated or treated overnight with 1 $\mu$ M staurosporine (STS) then stained with FITC-conjugated Annexin V and propidium iodide and analyzed by flow cytometry. C. Immunoblot analysis of the indicated proteins from HEK-TtH cells with or without HRas<sup>G12V</sup> and an shRNA targeting either scramble control or Drp1. D. HEK-TtH cells expressing HRas<sup>G12V</sup> and an shRNA targeting either scramble control or Drp1 were treated with 100 $\mu$ M Chloroquine, harvested at the indicated timepoints and analyzed by immunoblot analysis of the indicated proteins. E. The indicated HEK-TtH cells were injected into Nude mice and tumor volume was measured over time \* $p < 0.05$ . F. Tumors from were removed and photographed. G. RNA was isolated from 3 or 4 size-matched tumors and subjected to quantitative RT-PCR to determine the levels of VEGF. H. Portions of 3 size-matched tumors were formalin fixed and embedded in paraffin then sections were cut and stained for murine CD31. Scale bar = 200 $\mu$ m.

## Supplemental Experimental Procedures

### Plasmids

Two separate Drp1 shRNA sequences (5'-CAGGAGCCAGCTAGATATTAA) (Friedman et al., 2011) or (5' GGACTCTAACAGGTTACTGA) were cloned into pSuperior-Retro-Neo/GFP or pSuperior-Retro-Puro plasmids (Oligoengine). pSuperior-Retro-Puro-scramble control, pBabe-Bleo HRas<sup>G12V</sup>, pGEX-5X2-Drp1<sup>518-736</sup> and pBabe-Neo-Drp1<sup>K38A</sup> were described previously (Hamad et al., 2002; Kashatus et al., 2011). pGEX-5X2-Drp1<sup>518-736, S616A</sup> and pGEX-4T3-hErk2<sup>R67S</sup> were generated by site-directed mutagenesis, shRNA-resistant pBabe-Neo-Drp1-flag and pBabe-Neo-Drp1<sup>S616A</sup>-flag were generated by cloning flag-tagged Drp1 (Frank et al., 2001) into pBabe-Neo then introducing silent mutations at the shRNA recognition sequence and the S616A mutation by site-directed mutagenesis. Mek-DD was generated from human Mek1 (Turski et al., 2012) by mutagenesis and Mek-DD and Raf-22W (Hamad et al., 2002) were cloned into pcDNA3.1. mito-PAGFP was received from Addgene (Plasmid 23348). pDsRed2-Mito was received from Clontech (Plasmid 632421). Transgenes and shRNAs were stably introduced into human HEK-TtH or HeLa cells by retroviral infection as previously described (O'Hayer and Counter, 2006). Transient transfections were performed using FuGENE 6 transfection reagent (Promega) according to the manufacturer's instructions. PD325901 (TSZ chem) was resuspended in DMSO (AMRESCO) at a stock concentration of 10mM and diluted with DMEM to reach the indicated final concentrations.

### Recipes

RIPA buffer: 1% NP-40, 20mM Tris pH 8.0, 137mM NaCl, 10% glycerol, 2mM EDTA

SDS-Page sample loading buffer: 4% SDS, 100mM Tris pH 6.8, 2% 2-mercaptoethanol, 20% glycerol, 10µg/ml Bromophenol Blue

GST Elution Buffer: 100mM Tris pH 8.0, 120mM NaCl

Kinase Buffer: 20mM HEPES, 10mM MgCl<sub>2</sub>, 25mM β-glycerophosphate, 1mM Sodium orthovanadate, 100µM Dithiothreitol (DTT) and 100µM Adenosine triphosphate (ATP) with (Hot) or without (Cold) 1µCi γ-<sup>32</sup>P-ATP

### Antibodies

List of antibodies used in this study: α-Drp1, α-Opa1 (BD Transduction Laboratories), α-pS616-Drp1, α-β-tubulin, α-Erk1/2, α-pT202/Y204 Erk1/2, α-Mek, α-CoxIV, α-actin, α-GAPDH, α-BNIP3L/Nix, α-LC3A/B, α-SDHA, α-Mfn1, α-Mfn2, (Cell Signaling Technologies), α-Tom20, α-Raf, α-Fis1 (Santa Cruz Biotechnology), α-Flag (SIGMA), or α-VDAC/Porin (Calbiochem, EMD Millipore).

### Real-time PCR

Total RNA was extracted from a small portion of size-matched frozen xenograft tumors using TRIzol reagent (Life Technologies) according to the manufacturer's protocol. RNA concentration and quality was measured (BioTek Synergy 2 spectrophotometer) and samples were treated with DNase I (New England Biolabs) then inactivated. 1µg RNA per sample was reversed-transcribed (iScript cDNA synthesis kit, BioRad). Real-time PCR was performed on the Applied Biosystems StepOnePlus Real-Time PCR System employing SensiFast SYBR (Bioline) green detection chemistry. ΔΔCt was

calculated for each sample reaction using h $\beta$ 2M gene as an internal control. The following primers were used:  $\beta$ 2M forward (5'-CTATCCAGCGTACTCCAAAG),  $\beta$ 2M reverse (5'-ACAAGTCTGAATGCTCCACT); VEGF forward (5'-AGGAGGAGGGCAGAATCATCA), VEGF reverse (5'-CTCGATTGGATGGCAGTAGCT). The real-time PCR conditions were 95°C for 2 min, followed by 40 cycles of 95°C for 5 sec and 65°C for 30 sec. After the last PCR cycle, each sample was subject to thermal melting curve analysis to check for non-specific product formation.

### **Flow Cytometry**

For apoptosis measurement the indicated HEK-TtH cells were harvested by trypsinization, washed with cold PBS and resuspended in 1X Binding Buffer (10mM HEPES, pH 7.4; 140mM NaCl; 2.5mM CaCl<sub>2</sub>) at 10<sup>6</sup> cells/ml. 100 $\mu$ l of each cell suspension was transferred to a 5ml flow tube to which Annexin V-FITC (BD Pharmingen) and 15 $\mu$ g/ml Propidium Iodide (PI) (Sigma) were added. Cells incubated 15 minutes at RT in the dark, then 400 $\mu$ l of 1X Binding Buffer was added to each tube and cells were analyzed immediately on a FACSCalibur Benchtop Analyzer (Becton Dickinson/Cytek). For mitochondrial mass measurement the indicated cell lines were engineered to stably express mitochondrially-targeted YFP. Cells were then harvested by trypsinization, washed with cold PBS, resuspended in PBS at 5x10<sup>6</sup> cells/ml and analyzed immediately on a FACSCalibur Benchtop Analyzer (Becton Dickinson/Cytek). For membrane potential measurement the indicated cells lines were harvested by trypsinization, counted and adjusted to a density of 10<sup>6</sup> cells/ml in full culture media. Cells were incubated with 50nM TMRE (Biotium) for 30 minutes at 37°C, 5% CO<sub>2</sub>, then washed once with PBS, resuspended in PBS/0.2% BSA and analyzed immediately on a FACSCalibur Benchtop Analyzer (Becton Dickinson/Cytek).

### **Immunohistochemistry**

For analysis of angiogenesis, FFPE blocks of size-matched HEK-TtH; HRas<sup>G12V</sup> and HEK-TtH; HRas<sup>G12V</sup>; shDrp1 tumors were sectioned by the University of Virginia Research Histology Core for IHC as mentioned above, stained for mouse CD31-mouse (Abcam) and visualized on an Olympus BX51 microscope with a 20X objective.

### **Mitochondrial Stress Test**

Oxygen consumption rate (OCR) was measured using a Seahorse XF24 Extracellular Flux Analyzer with the XF Cell Mito Stress Test Kit. Cells were seeded at 8X10<sup>4</sup> cells per well in 100 $\mu$ l DMEM (Invitrogen 11965) containing 10% FBS and allowed to attach for 2 hours. 150 $\mu$ l DMEM-10% FBS was added per well and cells incubated overnight in 5% CO<sub>2</sub> humidified incubator. Prior to assay run, cells were changed into assay media, unbuffered DMEM (Invitrogen 12800) pH 7.4 and subjected to sequential injections of Oligomycin (1 $\mu$ M), FCCP (0.3 $\mu$ M), rotenone (1 $\mu$ M) and antimycin A (0.75 $\mu$ M). Spare respiratory capacity was calculated by dividing the OCR response to FCCP by the basal respiration, having subtracted the non-mitochondrial respiration previously. All values were normalized to cell number per wells setup in parallel.

### **Drug Treatments**

PD325901 (TSZ chem) was resuspended in DMSO (AMRESCO) at a stock concentration of 10mM and diluted with DMEM to reach the indicated final concentrations. Staurosporine (ENZO) was resuspended in DMSO at a stock concentration of 1mM. Chloroquine diphosphate salt (MP Biomedicals) was resuspended in water at a stock concentration of 100mM.

### **MTT Assay**

The described HEK-TtH cells were plated at 400 cells/well in 5 X 96-well plates and incubated for 72 hours. One plate was assayed every 24 hours by adding 15 $\mu$ l of 5mg/ml 3-(4,5-Dimethyl-2-thiazolyl)-2,5-diphenyl-2H-tetrazolium bromide (MTT; Sigma). After 4 hours at 37°C, medium was removed and cells were resuspended in 100 $\mu$ l DMSO. Absorbencies were recorded at 540nm (Martin and Clynes, 1993).



## Supplemental References

Frank, S., Gaume, B., Bergmann-Leitner, E.S., Leitner, W.W., Robert, E.G., Catez, F., Smith, C.L., and Youle, R.J. (2001). The role of dynamin-related protein 1, a mediator of mitochondrial fission, in apoptosis. *Dev. Cell* *1*, 515–525.

Friedman, J.R., Lackner, L.L., West, M., DiBenedetto, J.R., Nunnari, J., and Voeltz, G.K. (2011). ER tubules mark sites of mitochondrial division. *Science* *334*, 358–362.

Hamad, N.M., Elconin, J.H., Karnoub, A.E., Bai, W., Rich, J.N., Abraham, R.T., Der, C.J., and Counter, C.M. (2002). Distinct requirements for Ras oncogenesis in human versus mouse cells. *Gene Dev.* *16*, 2045–2057.

Kashatus, D.F., Lim, K.-H., Brady, D.C., Pershing, N.L.K., Cox, A.D., and Counter, C.M. (2011). RALA and RALBP1 regulate mitochondrial fission at mitosis. *Nat. Cell Biol.* *13*, 1108–1115.

Martin, A., and Clynes, M. (1993). Comparison of 5 microplate colorimetric assays for in vitro cytotoxicity testing and cell proliferation assays. *Cytotechnology* *11*, 49–58.

O'Hayer, K., and Counter, C. (2006). A genetically defined normal human somatic cell system to study ras oncogenesis in vivo and in vitro. *Method Enzymol.* *407*, 637–647.

Turski, M.L., Brady, D.C., Kim, H.J., Kim, B.E., Nose, Y., Counter, C.M., Winge, D.R., and Thiele, D.J. (2012). A novel role for copper in Ras/mitogen-activated protein kinase signaling. *Mol. Cell. Biol.* *32*, 1284–1295.
